# Supplementary material for: Efficacy of Oral Cryotherapy in the Prevention of Oral Mucositis Associated with Cancer Chemotherapy: Systematic Review with Meta-Analysis and Trial Sequential Analysis
Source: MDPI journal article supplement (doi:10.3390/curroncol28040250), 2021-07-29
Supplement: s1 [file s1]

**Table S1:** Search terms and results oral cryotherapy

| #  | Keyword                                   | Medline | Embase  | CENTRAL |
|----|-------------------------------------------|---------|---------|---------|
| 1  | exp NEOPLASMS/                            | 3325911 | 4875367 | 77595   |
| 2  | exp LEUKEMIA/                             | 231007  | 335868  | 4644    |
| 3  | exp LYMPHOMA/                             | 170899  | 324641  | 3173    |
| 4  | exp RADIOTHERAPY/                         | 184473  | 598222  | 5856    |
| 5  | exp Antineoplastic agents/                | 1092432 | 2344609 | 54485   |
| 6  | Bone Marrow Transplantation/              | 44508   | 53048   | 1368    |
| 7  | neoplasm\$.mp.                            | 2805134 | 874920  | 79397   |
| 8  | cancer\$.mp.                              | 1804027 | 3712965 | 169046  |
| 9  | (leukaemi\$ or leukemi\$).mp.             | 329165  | 503434  | 15026   |
| 10 | (tumour\$ or tumor\$).mp.                 | 2110490 | 3381384 | 78405   |
| 11 | malignan\$.mp.                            | 577527  | 953635  | 27680   |
| 12 | neutropeni\$.mp.                          | 44812   | 130357  | 14301   |
| 13 | carcino\$.mp.                             | 1032312 | 1627071 | 45899   |
| 14 | adenocarcinoma\$.mp.                      | 240394  | 293463  | 11190   |
| 15 | lymphoma\$.mp.                            | 245229  | 343706  | 12414   |
| 16 | (radioth\$ or radiat\$ or irradiat\$).mp. | 901010  | 1446902 | 51221   |
| 17 | (bone adj marrow adj5 transplant\$).mp.   | 58908   | 90028   | 4001    |
| 18 | chemo\$.mp.                               | 763392  | 1369673 | 92912   |
| 19 | or/1-18                                   | 5732334 | 8427225 | 292944  |
| 20 | exp STOMATITIS/                           | 16660   | 53767   | 1024    |
| 21 | Candidiasis, Oral/                        | 4676    | 3890    | 213     |
| 22 | stomatitis.mp.                            | 24360   | 46240   | 3995    |
| 23 | mucositis.mp.                             | 10054   | 18284   | 3488    |
| 24 | (oral adj6 mucos\$).mp.                   | 23056   | 34044   | 3078    |
| 25 | (mycosis or mycotic).mp.                  | 18418   | 81913   | 1489    |
| 26 | mIAS.ti,ab.                               | 370     | 544     | 20      |
| 27 | or/20-26                                  | 78010   | 188196  | 9678    |
| 28 | Cryotherapy/                              | 5074    | 18623   | 639     |
| 29 | cryotherap\$.mp.                          | 10298   | 21896   | 2150    |
| 30 | (cold or freez\$ or ice).mp.              | 255226  | 341679  | 14941   |
| 31 | or/28-30                                  | 263524  | 360356  | 16427   |
| 32 | random\$.ti,ab.                           | 1134276 | 1553420 | 956392  |
| 33 | placebo\$.ti,ab.                          | 215062  | 314382  | 298344  |
| 34 | (doubl\$ adj blind\$).ti,ab.              | 150707  | 215598  | 239421  |
| 35 | (singl\$ adj blind\$).ti,ab.              | 18288   | 25139   | 27309   |
| 36 | allocat\$.ti,ab.                          | 119218  | 154053  | 75281   |

|    |                                                                  |         |            |       |
|----|------------------------------------------------------------------|---------|------------|-------|
| 37 | clinical study/ or clinical trial/ or controlled clinical trial/ | 549332  | 1217093    | 53    |
| 38 | OR/32-37                                                         | 1636647 | 2616621    | 14941 |
| 39 | 19 and 27 and 31 and 38                                          | 95      | <b>317</b> | 97    |

**Table S2** Excluded articles for oral cryotherapy with reason

| #  | Author/Year                   | Title                                                                                                                                                                                                                            | Reason                                                           |
|----|-------------------------------|----------------------------------------------------------------------------------------------------------------------------------------------------------------------------------------------------------------------------------|------------------------------------------------------------------|
| 1  | <b>J Stubner 2019</b>         | Efficacy of higher temperature cryotherapy.                                                                                                                                                                                      | Healthy participants, testing alternative oral cooling technique |
| 2  | <b>J.-E., Johansson 2019</b>  | Cryotherapy as prophylaxis against oral mucositis after high-dose melphalan and autologous stem cell transplantation for myeloma: a randomised, open-label, phase 3, non-inferiority trial                                       | Both groups received oral cryotherapy                            |
| 3  | <b>J., Walladbegi 2017</b>    | Innovative intraoral cooling device better tolerated and equally effective as ice cooling                                                                                                                                        | Healthy participants, testing alternative oral cooling technique |
| 4  | <b>Y.K., Cho 2017</b>         | Associations of High-Dose Melphalan Pharmacokinetics and Outcomes in the Setting of a Randomized Cryotherapy Trial                                                                                                               | Both groups received oral cryotherapy                            |
| 5  | <b>P.E.D., dos Reis 2016</b>  | Chamomile infusion cryotherapy to prevent oral mucositis induced by chemotherapy: a pilot study                                                                                                                                  | Both groups received oral cryotherapy                            |
| 6  | <b>L., Leppla 2016</b>        | An oral care self-management support protocol (OrCaSS) to reduce oral mucositis in hospitalized patients with acute myeloid leukemia and allogeneic hematopoietic stem cell transplantation: a randomized controlled pilot study | No cryotherapy                                                   |
| 7  | <b>J., Walladbegi 2016</b>    | Comfortable cooling device versus nature                                                                                                                                                                                         | Both groups received oral cryotherapy                            |
| 8  | <b>A., Svanberg 2015</b>      | Caphosol() mouthwash gives no additional protection against oral mucositis compared to cryotherapy alone in stem cell transplantation. A pilot study                                                                             | Both groups received oral cryotherapy                            |
| 9  | <b>D.J., Harris 2008</b>      | Putting evidence into practice: evidence-based interventions for the management of oral mucositis                                                                                                                                | Review                                                           |
| 10 | <b>H.V., Worthington 2007</b> | Interventions for preventing oral mucositis for patients with cancer receiving treatment                                                                                                                                         | Review                                                           |
| 11 | <b>K., Choi 2007</b>          | The effect of oral glutamine on 5-fluorouracil/leucovorin-induced mucositis/stomatitis assessed by intestinal permeability test                                                                                                  | Healthy participants, no control                                 |

|    |                                  |                                                                                                                                                                                                                            |                                       |
|----|----------------------------------|----------------------------------------------------------------------------------------------------------------------------------------------------------------------------------------------------------------------------|---------------------------------------|
| 12 | <b>O.K., Arikan 2006</b>         | A prospective randomized controlled trial to determine if cryotherapy can reduce the pain of patients with minor form of recurrent aphthous stomatitis                                                                     | Non-oncology related stomatitis       |
| 13 | <b>S., Nikoletti 2005</b>        | Comparison of plain ice and flavored ice for preventing oral mucositis associated with the use of 5 fluorouracil                                                                                                           | Both groups received oral cryotherapy |
| 14 | <b>M., Nottage 2003</b>          | Sucralfate mouthwash for prevention and treatment of 5-fluorouracil-induced mucositis: A randomized, placebo-controlled trial                                                                                              | Both groups received oral cryotherapy |
| 15 | <b>J.E., Clarkson 2003</b>       | Interventions for preventing oral mucositis for patients with cancer receiving treatment                                                                                                                                   | Review                                |
| 16 | <b>S.H., Okuno 1999</b>          | Alleviation of gastrointestinal mucosal toxicity related to chemotherapy and radiation therapy: The NCCTG experience                                                                                                       | Review? No access                     |
| 17 | <b>P., Plevova 1999</b>          | Prevention and treatment of chemotherapy- and radiotherapy-induced oral mucositis: A review                                                                                                                                | Review                                |
| 18 | <b>S.H., Okuno 1999</b>          | Phase III controlled evaluation of glutamine for decreasing stomatitis in patients receiving fluorouracil (5-FU)-based chemotherapy                                                                                        | Both groups received oral cryotherapy |
| 19 | <b>C.L., Loprinzi 1997</b>       | Phase III controlled evaluation of sucralfate to alleviate stomatitis in patients receiving fluorouracil-based chemotherapy                                                                                                | Both groups received oral cryotherapy |
| 20 | <b>P., Fidler 1996</b>           | Prospective evaluation of a chamomile mouthwash for prevention of 5-FU- induced oral mucositis                                                                                                                             | Both groups received oral cryotherapy |
| 21 | <b>Rocke, L K 1993</b>           | A randomized clinical trial of two different durations of oral cryotherapy for prevention of 5-fluorouracil-related stomatitis.                                                                                            | Both groups received oral cryotherapy |
| 22 | <b>S., Cabrera-Jaime 2018</b>    | Efficacy of Plantago major, chlorhexidine 0.12% and sodium bicarbonate 5% solution in the treatment of oral mucositis in cancer patients with solid tumour: a feasibility randomised triple-blind phase III clinical trial | No cryotherapy                        |
| 23 | <b>L., Mishra 2017</b>           | Effect of flavored (Honey and tulsi) ice chips on reduction of oral mucositis among children receiving chemo therapy                                                                                                       | Both groups received cryotherapy      |
| 24 | <b>Fidler P O'Fallon JR 1996</b> | Prospective evaluation of a chamomile mouthwash for prevention of 5-FU-induced oral mucositis                                                                                                                              | Both groups received cryotherapy      |
| 25 | <b>: Gjurik, Mirjana 2017</b>    | Oral mucositis during melphalan conditioning for autologous transplantation in multiple myeloma: can local cryotherapy help?                                                                                               | NO FULL TEXT ACCESS                   |
| 26 | <b>Lu 2013</b>                   | Oral Cryotherapy For The Prevention Of Mucositis Following Myeloablative Conditioning and Hematopoietic Stem Cell Transplantation                                                                                          | Both groups received cryotherapy      |
| 27 | <b>D.W., Sborov 2014</b>         | 2-hour cryotherapy effectively reduces severe mucositis associated with high-dose melphalan followed by stem cell rescue: Results from a randomized trial                                                                  | Both groups received cryotherapy      |

|    |                                   |                                                                                                                                                                                                                                       |                                                                                                           |
|----|-----------------------------------|---------------------------------------------------------------------------------------------------------------------------------------------------------------------------------------------------------------------------------------|-----------------------------------------------------------------------------------------------------------|
| 28 | <b>T., Kamsvag Magnusson 2016</b> | Oral cryotherapy in children receiving high dose chemotherapy to avoid mucositis - Is it feasible?                                                                                                                                    | Irrlevant outcome, children                                                                               |
| 29 | <b>E., Papadeas 2007</b>          | Prevention of 5-fluorouracil-related stomatitis by oral cryotherapy: A randomized controlled study                                                                                                                                    | Not RCT                                                                                                   |
| 30 | <b>E., Papadeas 2007</b>          | Prevention of 5-fluorouracil-related stomatitis by oral cryotherapy: A randomized controlled study                                                                                                                                    | Not RCT                                                                                                   |
| 31 | <b>Shin N 2019</b>                | [The Effects of Oral Cryotherapy on Oral Mucositis, Reactive Oxygen Series, Inflammatory Cytokines, and Oral Comfort in Gynecologic Cancer Patients Undergoing Chemotherapy: A Randomized Controlled Trial]. Shin N, Kang Y. Apr 2019 | Primary Outcome: Level of stomatitis measured by Oral assessment guide (OAG)<br><br>Korean no translation |
| 32 | <b>Y., Erden 2017</b>             | Comparison of efficacy of cryotherapy and chlorhexidine to oral nutrition transition time in chemotherapy-induced oral mucositisj                                                                                                     | Irrlevant outcome                                                                                         |
| 33 | <b>de Paula Eduardo F 2015</b>    | Efficacy of cryotherapy associated with laser therapy for decreasing severity of melphalan-induced oral mucositis during hematological stem-cell transplantation: a prospective clinical study.                                       | LLLT co-intervention,                                                                                     |

**Table S3** Egger's regression test for OC in preventing OM (any grade)

Egger's test

| Std_Eff | Coef.     | Std. Err. | t     | P> t  | [95% Conf. Interval] |           |
|---------|-----------|-----------|-------|-------|----------------------|-----------|
| slope   | .2147873  | .0404778  | 5.31  | 0.000 | .1293865             | .300188   |
| bias    | -3.418132 | .363481   | -9.40 | 0.000 | -4.18501             | -2.651254 |

**Table S4** Egger's regression test (OM moderate-severe grade)

Egger's test

| Std_Eff | Coef.     | Std. Err. | t     | P> t  | [95% Conf. Interval] |           |
|---------|-----------|-----------|-------|-------|----------------------|-----------|
| slope   | .235639   | .104693   | 2.25  | 0.040 | .0124912             | .4587867  |
| bias    | -2.504904 | .568947   | -4.40 | 0.001 | -3.717586            | -1.292222 |

**Table S5** Egger's regression test (Severe grade)

Egger's test

| Std_Eff | Coef.     | Std. Err. | t     | P> t  | [95% Conf. Interval] |           |
|---------|-----------|-----------|-------|-------|----------------------|-----------|
| slope   | .2803763  | .1719694  | 1.63  | 0.124 | -.0861679            | .6469205  |
| bias    | -2.310736 | .4290062  | -5.39 | 0.000 | -3.225141            | -1.396331 |

Table S6: summary of findings and level of evidence for OC meta-analysis

Summary of findings:

### Oral Cryotherapy compared to Controls for Prevention of oral mucositis

**Patient or population:** Prevention of oral mucositis

**Setting:**

**Intervention:** Oral Cryotherapy

**Comparison:** Control

| Outcomes                                                | Anticipated absolute effects*<br>(95% CI) |                                      | Relative effect<br>(95% CI)      | No of<br>participants<br>(studies) | Certainty of the<br>evidence<br>(GRADE) | Comments |
|---------------------------------------------------------|-------------------------------------------|--------------------------------------|----------------------------------|------------------------------------|-----------------------------------------|----------|
|                                                         | Risk with<br>Control                      | Risk with Oral<br>Cryotherapy        |                                  |                                    |                                         |          |
| Incidence of<br>oral mucositis<br>(Any grade)           | 742 per 1,000                             | <b>497 per 1,000</b><br>(416 to 601) | <b>RR 0.67</b><br>(0.56 to 0.81) | 1577<br>(14 RCTs)                  | ⊕⊕⊕○<br>MODERATE                        |          |
| Incidence of<br>oral mucositis<br>(Moderate-<br>Severe) | 492 per 1,000                             | <b>310 per 1,000</b><br>(241 to 403) | <b>RR 0.63</b><br>(0.49 to 0.82) | 1505<br>(14 RCTs)                  | ⊕⊕⊕○<br>MODERATE                        |          |
| Incidence of<br>oral mucositis<br>(Severe)              | 293 per 1,000                             | <b>138 per 1,000</b><br>(100 to 187) | <b>RR 0.47</b><br>(0.34 to 0.64) | 1577<br>(14 RCTs)                  | ⊕⊕⊕○<br>MODERATE                        |          |

\*The risk in the intervention group (and its 95% confidence interval) is based on the assumed risk in the comparison group and the **relative effect** of the intervention (and its 95% CI).

CI: Confidence interval; RR: Risk ratio

#### GRADE Working Group grades of evidence

**High certainty:** We are very confident that the true effect lies close to that of the estimate of the effect

**Moderate certainty:** We are moderately confident in the effect estimate: The true effect is likely to be close to the estimate of the effect, but there is a possibility that it is substantially different

**Low certainty:** Our confidence in the effect estimate is limited: The true effect may be substantially different from the estimate of the effect

**Very low certainty:** We have very little confidence in the effect estimate: The true effect is likely to be substantially different from the estimate of effect

| <i>Author</i>         | Random sequence generation | Allocation concealment | Blinding of participants and personnel | Blinding of outcome assessment | Incomplete outcome data | Selective reporting | Overall bias |
|-----------------------|----------------------------|------------------------|----------------------------------------|--------------------------------|-------------------------|---------------------|--------------|
| <i>Yin Lu 2019</i>    | +                          | ?                      | -                                      | -                              | +                       | +                   | -            |
| <i>Marchesi 2017</i>  | +                          | ?                      | -                                      | -                              | +                       | +                   | -            |
| <i>Askarifar 2016</i> | +                          | +                      | -                                      | -                              | -                       | +                   | -            |
| <i>Toro 2013</i>      | +                          | +                      | -                                      | -                              | +                       | +                   | -            |
| <i>Kataranci 2012</i> | +                          | ?                      | -                                      | -                              | +                       | +                   | -            |
| <i>Salvador 2012</i>  | +                          | +                      | -                                      | -                              | +                       | +                   | -            |
| <i>Heydari 2012</i>   | +                          | +                      | -                                      | -                              | +                       | +                   | -            |
| <i>Zhang 2011</i>     | +                          | ?                      | -                                      | -                              | +                       | -                   | -            |
| <i>Sorensen 2008</i>  | +                          | ?                      | -                                      | -                              | -                       | +                   | -            |
| <i>Svanberg 2007</i>  | +                          | +                      | -                                      | -                              | +                       | -                   | -            |
| <i>Gori 2007</i>      | +                          | ?                      | -                                      | -                              | +                       | +                   | -            |
| <i>Lilleby 2006</i>   | +                          | +                      | -                                      | -                              | +                       | +                   | -            |
| <i>Cascinu 1994</i>   | +                          | +                      | -                                      | -                              | +                       | +                   | -            |
| <i>Mahood 1991</i>    | +                          | ?                      | -                                      | -                              | +                       | +                   | -            |

  

|   |              |
|---|--------------|
| + | Low risk     |
| - | High risk    |
| ? | Unknown risk |

**Figure S1.** Risk of bias analysis for included studies.

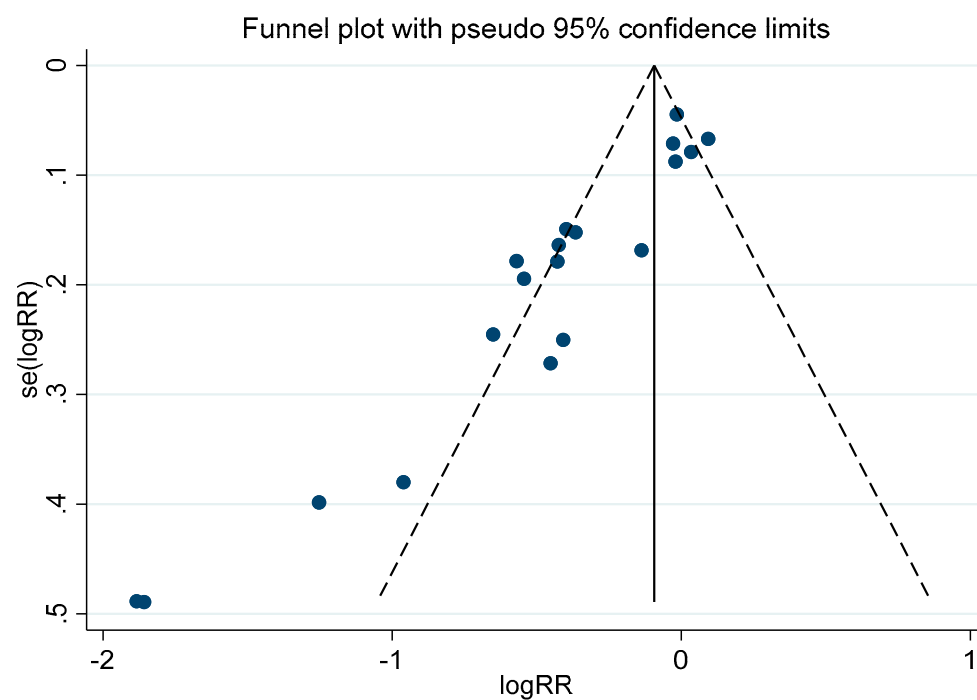

**Figure S2** Funnel plot asymmetry test for included studies in oral cryotherapy meta-analysis (OM any grade)

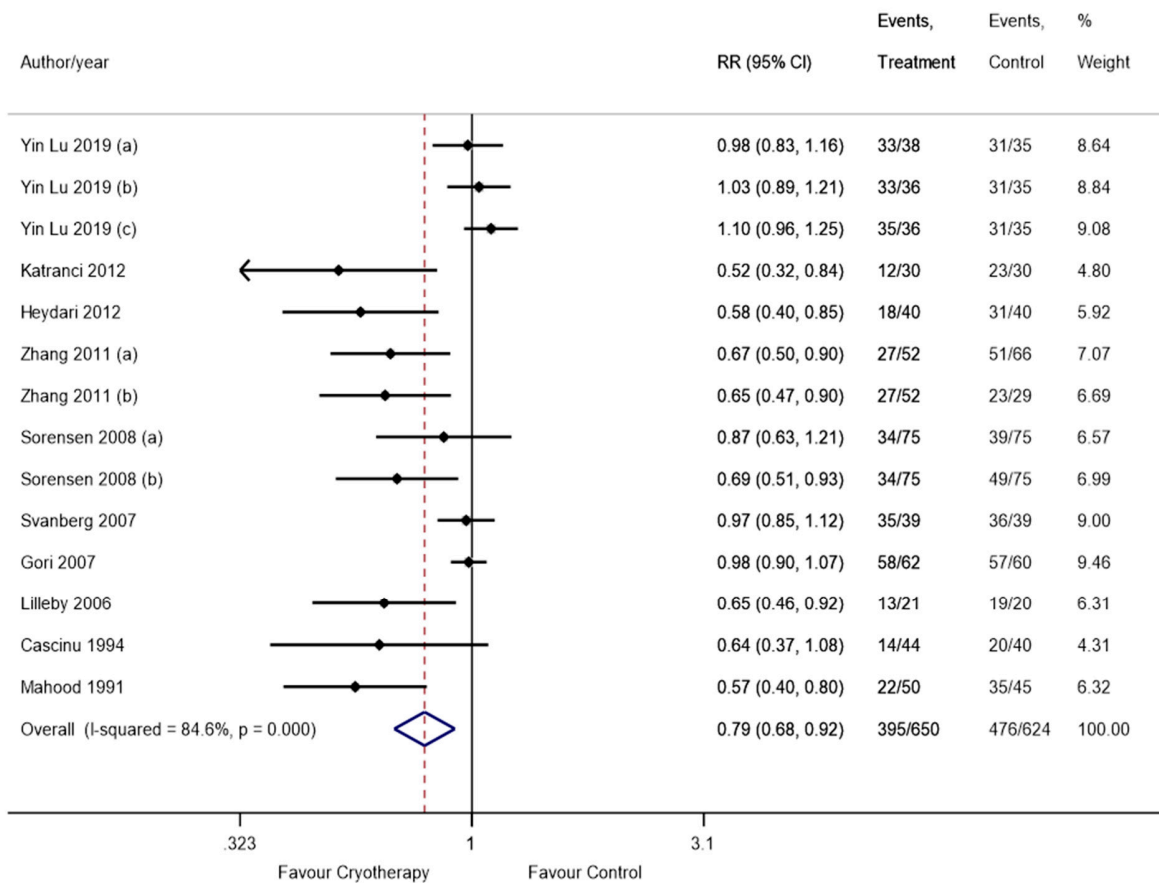



**Figure S3.** Forest plot for sensitivity analysis illustrating subgroup analysis of the effects of OC on the incidence of OM (any grade) in patients based on the underlying malignancy.

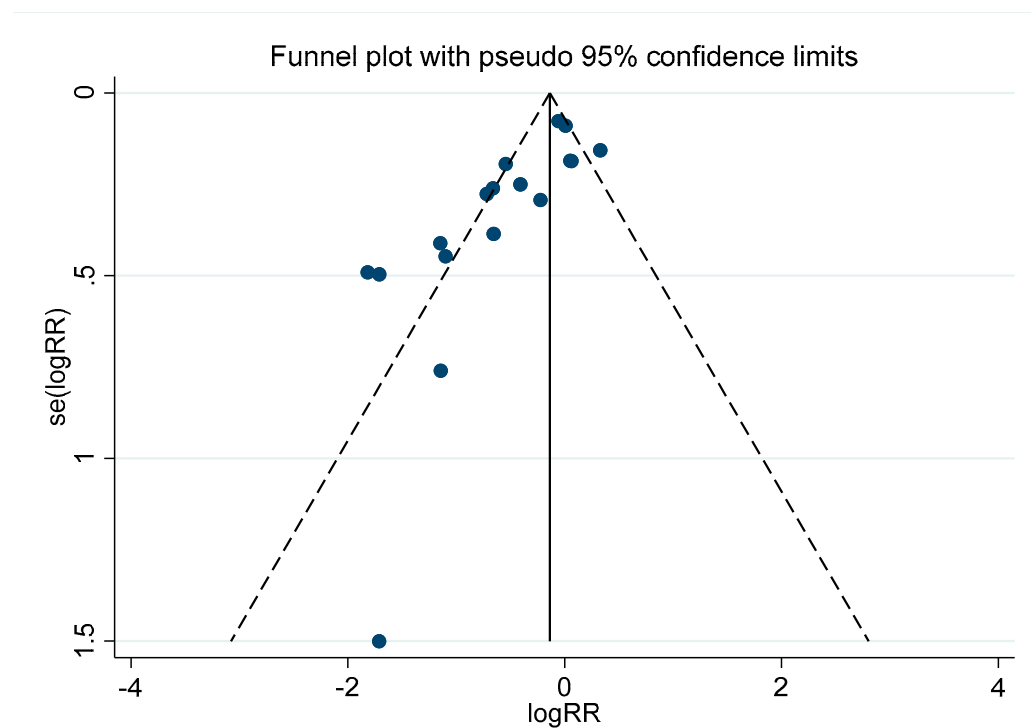

**Figure S4:** Funnel-plot illustrating the publication bias for oral cryotherapy studies (OM moderate-severe grade)

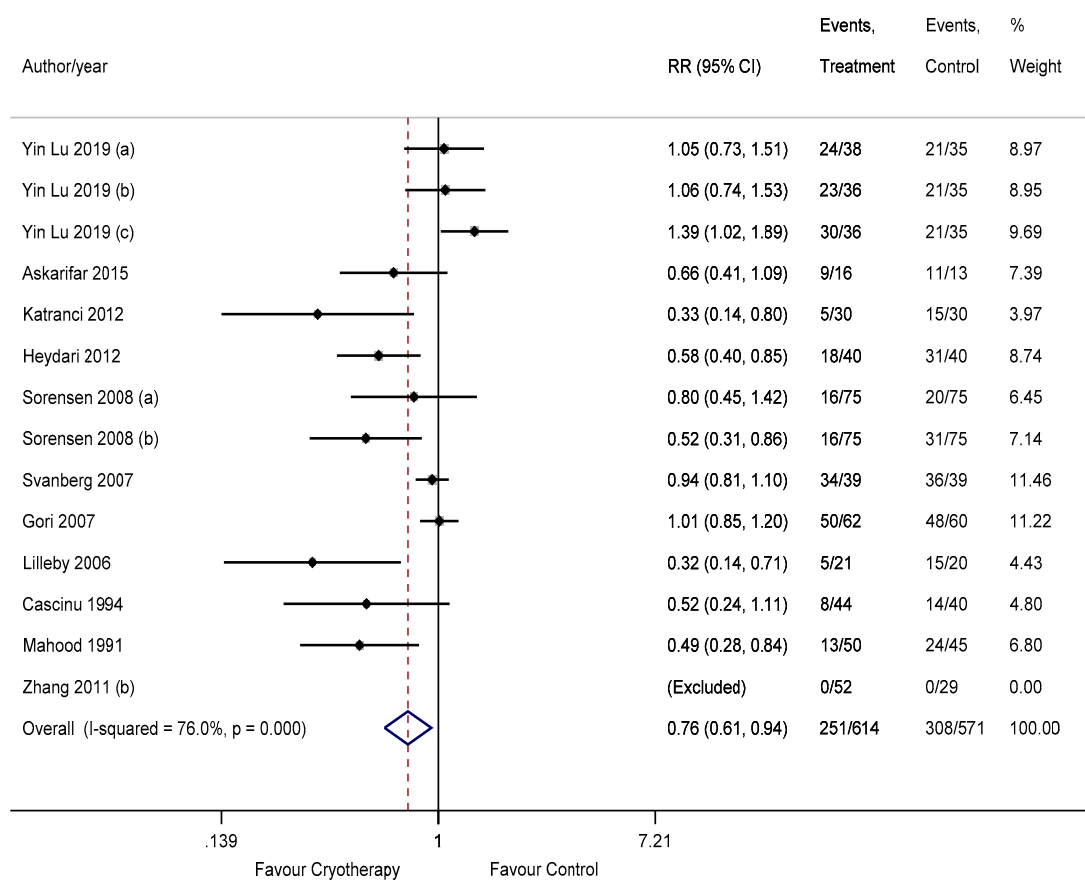

**Figure S5:** Forest plot for sensitivity analysis illustrating subgroup analysis of the effects of OC on the incidence of OM (moderate-severe grade) in patients based on the underlying malignancy.

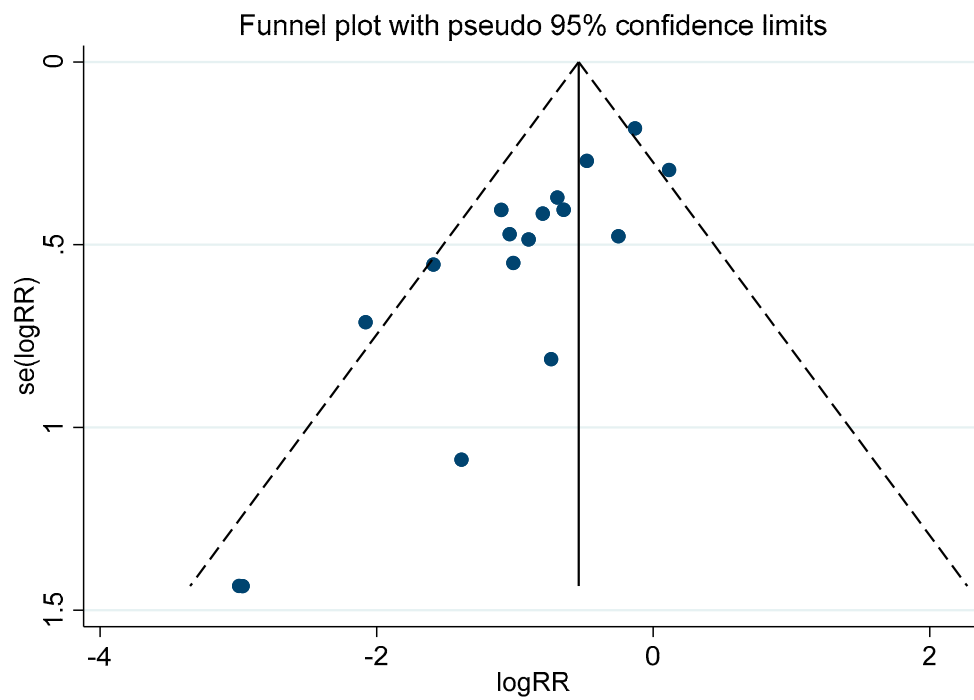

**Figure S6:** Funnel-plot illustrating the publication bias for oral cryotherapy studies (OM severe grade)

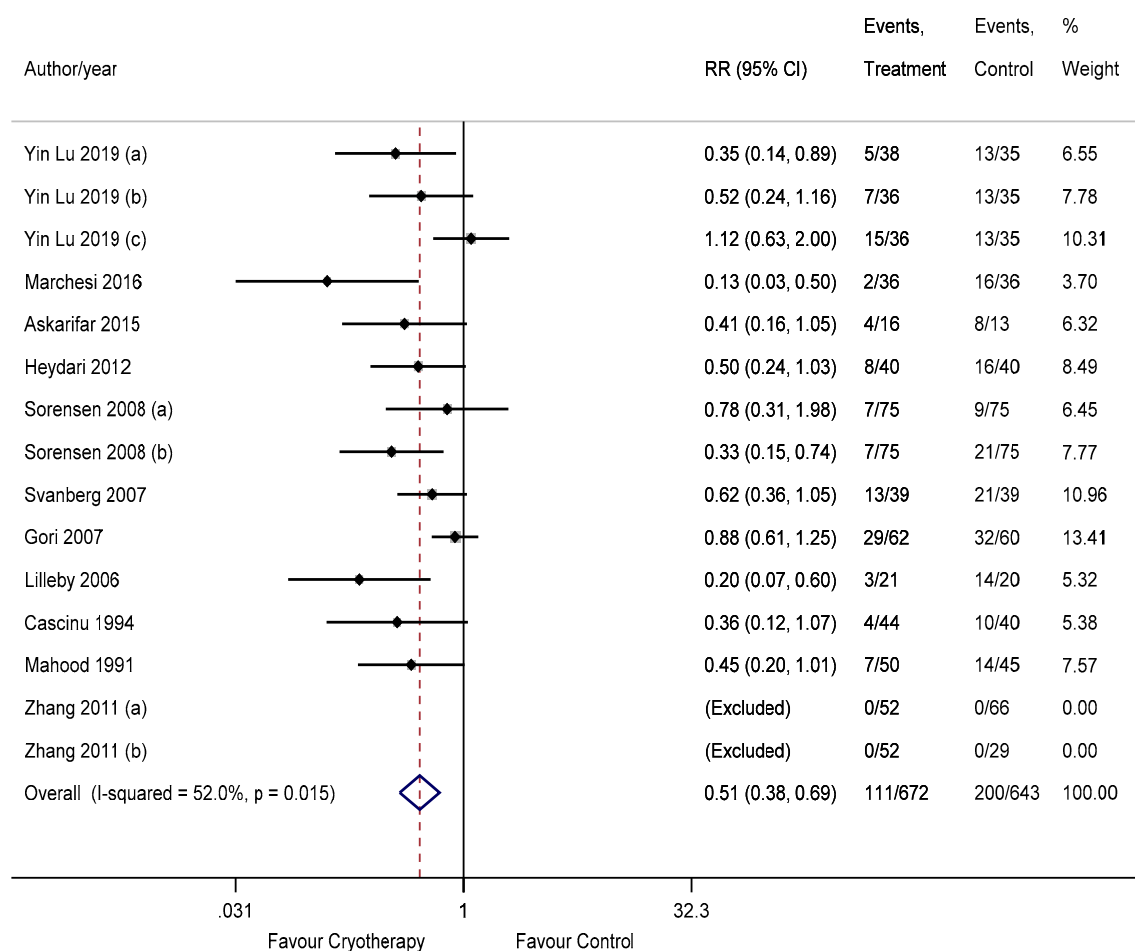

**Figure S7:** Forest plot for sensitivity analysis illustrating subgroup analysis of the effects of OC on the incidence of OM (severe) in patients based on the underlying malignancy.
